# Supplementary material for: Parenteral vaccination protects against transcervical infection with Chlamydia trachomatis and generate tissue-resident T cells post-challenge
Source: PubMed Central journal article supplement (PMC6978417; doi:10.1038/s41541-020-0157-x), 2020-01-23
Supplement: 41541_2020_157_MOESM1_ESM.pdf [file 41541_2020_157_MOESM1_ESM.pdf]

**Parenteral vaccination protect against a transcervical infection with *Chlamydia trachomatis* and generate tissue resident T cells post challenge**

*Nina Dieu Nhien Tran Nguyen<sup>1</sup>, Anja W. Olsen<sup>1</sup>, Emma Lorenzen<sup>1</sup>, Peter Andersen<sup>1</sup>, Malene Hvid<sup>2</sup>, Frank Follmann<sup>1</sup>, Jes Dietrich<sup>1,\*</sup>*

<sup>1</sup> Statens Serum Institut, Department for Infectious Disease Immunology, Denmark

<sup>2</sup> Department of Biomedicine and Department of Clinical Medicine, Aarhus University

**Supplementary information**

**a**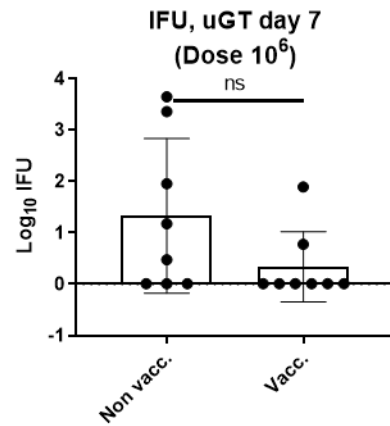**b**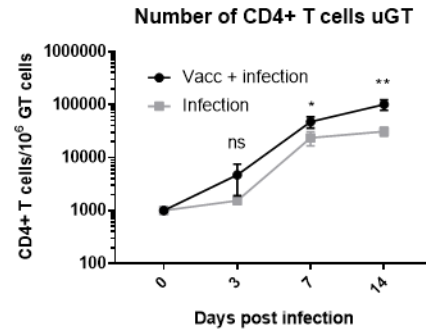**c**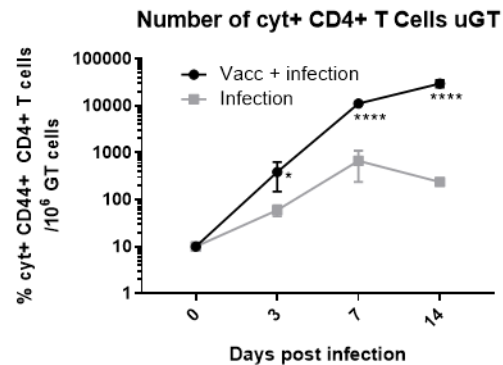**Supplementary figure 1.**

**T cells are recruited to uGT upon infection and responds, but no effect on bacterial level is observed.**

Groups of female B6C3F1 mice (n=8) were vaccinated three time subcutaneously (s.c.) with CTH522 antigen and CAF01 adjuvant at two weeks intervals. Three weeks after the last immunization, the mice received a transcervical (TC). 7 days post a TC infection bacterial burden was determined by counting IFUs in upper GT (uGT) swab samples from mice receiving a dose of  $10^6$  *C.t.* SvD. The experiment was part of the experiment shown in figure 2 a and b. Bars indicate medians with interquartile ranges (IQR). Statistical significance was evaluated by a Mann Whitney test using GraphPad Prism version 7.04. The number of CD4+ T cells in the GTs are shown in mice receiving  $10^5$  IFU of *C.t.* SvD. The number of cyt+ CD4+ T cells (expressing any combination of the cytokines  $INF\gamma/IL-2/IL-17/TNF\alpha$ ) in uGT at the indicated timepoint post infection. Statistical significance was evaluated by an unpaired *t* test using GraphPad Prism version 7.04. ns: not significantly different. \* $p < 0.05$ , \*\* $p < 0.01$ , \*\*\*\* $p < 0.0001$ .

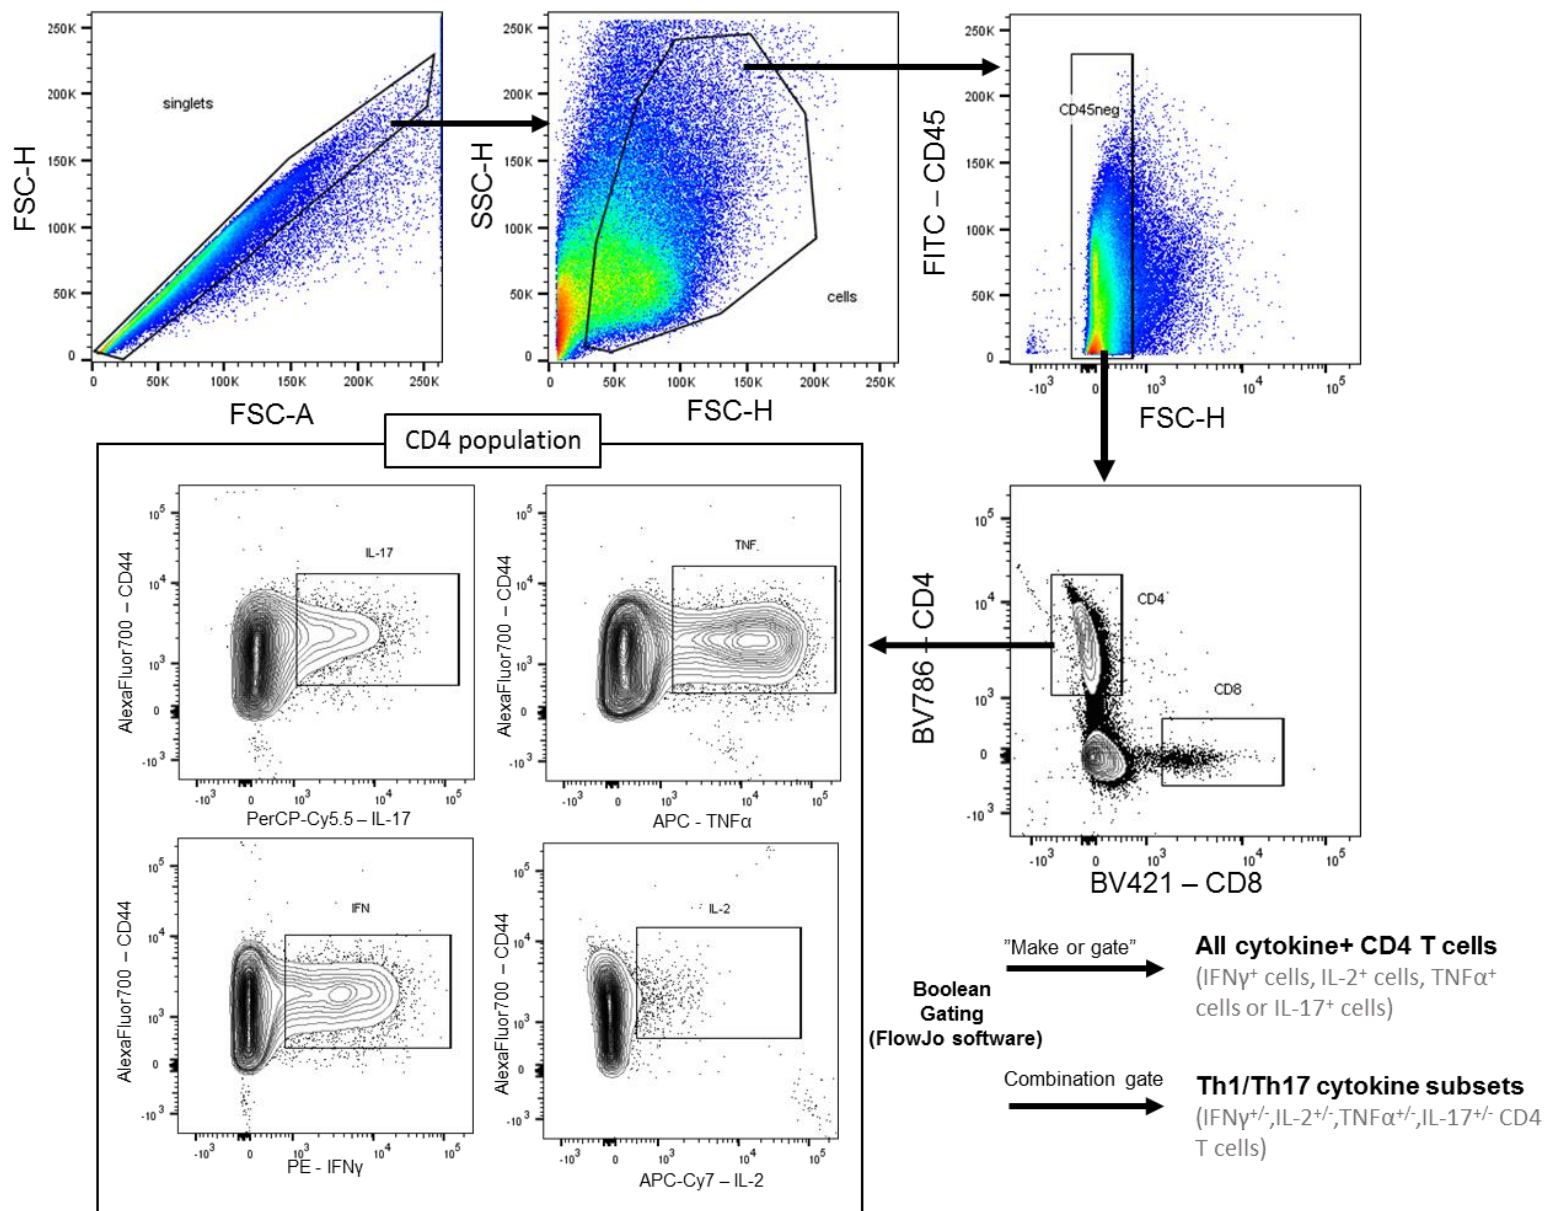

**Supplementary figure 2.**  
**Flow cytometry gating strategy for T cell analysis**

Gating strategy used to analyze CD4 T cells, CD8 T cells, cytokine+ CD4 T cells and Th1/Th17 cells in uGT and ILN samples. Doublets were excluded by plotting FSC-height (H) vs. FSC-area (A). Cell debris were excluded on SSC-H and SSC-A. To analyse tissue leukocytes and exclude vascular leukocytes the mice were i.v.- injected with CD45-FITC before euthanization and i.v. CD45<sup>+</sup> cells were excluded from the analysis. CD4 and CD8 gating was applied and CD4 cells were further analysed for CD44<sup>+</sup> cytokine<sup>+</sup> (IFN $\gamma$ , IL-2, TNF $\alpha$ , IL-17) expression. To determine the frequency of all cytokine<sup>+</sup> CD4 T cells and Th1/Th17 cytokine subsets boolean gating was applied to the gated IFN $\gamma$ <sup>+</sup> cells, IL-2<sup>+</sup> cells, TNF $\alpha$ <sup>+</sup> cells, IL-17<sup>+</sup> cells. To determine the frequency of the cyt<sup>+</sup> CD4 T cell population all the four CD44<sup>+</sup> cyt<sup>+</sup> CD4 T populations were included in one gate by the “make or gate” function in FlowJo software. The frequency of Th1/Th17 cytokine subsets were determined by creating combination gates of all the possible combinations of the four CD44<sup>+</sup> cyt<sup>+</sup> CD4 T populations (CD44<sup>+</sup>, IFN $\gamma$ <sup>+/-</sup>, IL-2<sup>+/-</sup>, TNF $\alpha$ <sup>+/-</sup>, IL-17<sup>+/-</sup> CD4 T cells)

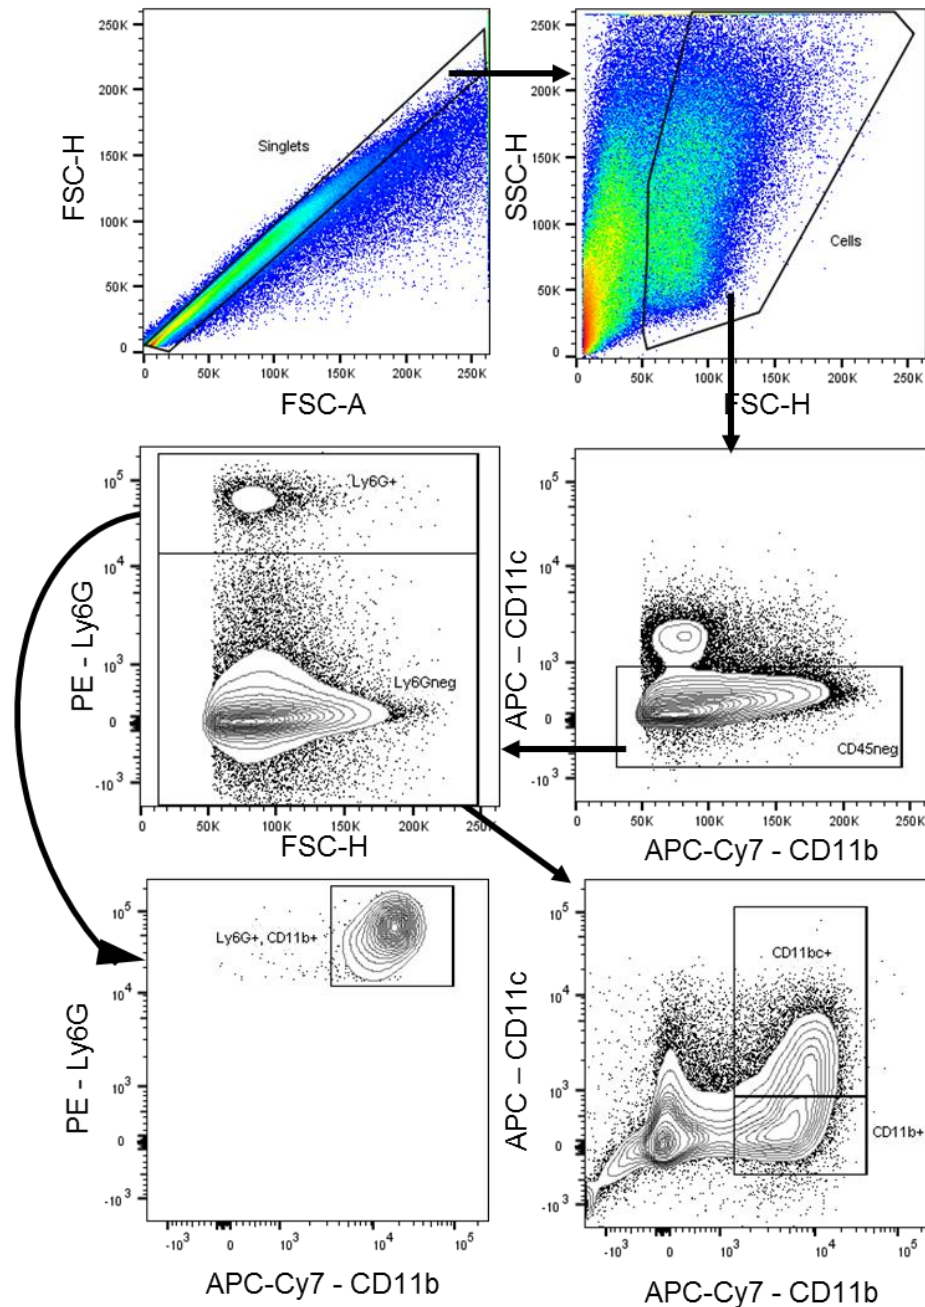

### Supplementary figure 3.

#### **Flow cytometry gating strategy for innate cell analysis.**

Gating strategy used to analyze in uGT and ILN samples. Doublets were excluded by plotting FSC-height (H) vs. FSC-area (A). Cell debris were excluded on SSC-H and SSC-A. To analyse tissue leukocytes and exclude vascular leukocytes the mice were i.v.- injected with CD45-FITC before euthanization and i.v.  $CD45^+$  cells were excluded from the analysis. Cells were then distinguished into  $Ly6G^{+/+}$  populations.  $Ly6G^+$  cells were further gated for  $Ly6G^+ CD11b^+$  cells to determine the neutrophil population. The  $Ly6G^-$  population were gated into macrophages ( $Ly6G^-CD11b^+CD11c^-$ ) and dendritic cells (DCs)( $Ly6G^-CD11b^+CD11c^+$ ).

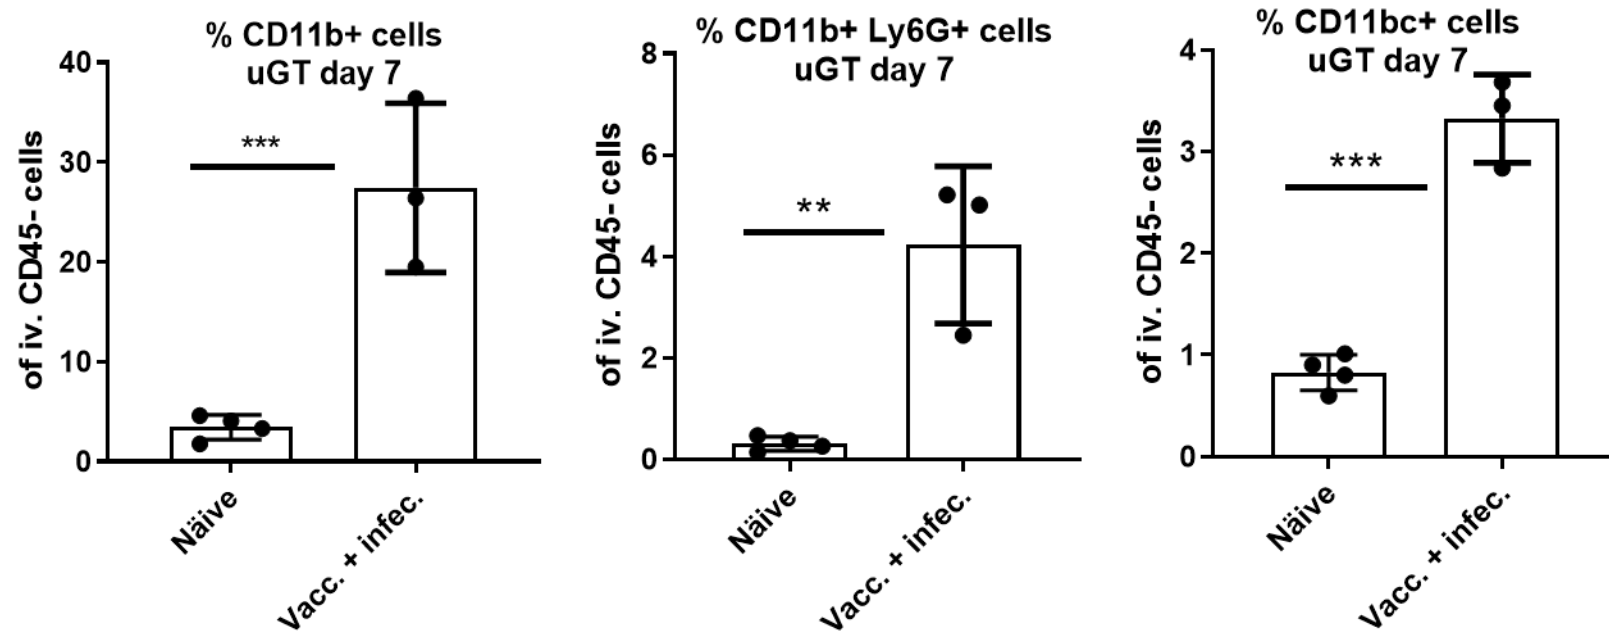

**Supplementary figure 4.**

**Innate response towards an infection with  $10^5$  IFU of *C.t.* SvD.**

Groups of female B6C3F1 mice received a TC infection with  $10^5$  IFU of *C.t.* SvD. 7 days post infection, cells from the uGT were stained with the indicated surface markers and analyzed by flow cytometry for the percentage of innate cells in uGT. Neutrophils (Ly6G<sup>+</sup>CD11b<sup>+</sup>), macrophages (Ly6G<sup>-</sup>CD11b<sup>+</sup>CD11c<sup>-</sup>) and dendritic cells (Ly6G<sup>-</sup>CD11b<sup>+</sup>CD11c<sup>+</sup>). Bars indicate means  $\pm$ SD, \*\*p<0.01, \*\*\*p<0.001.

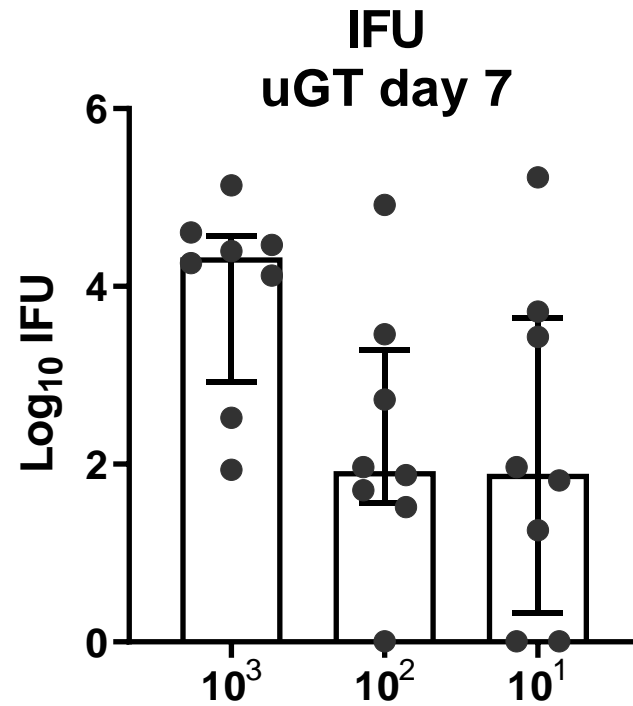

**Supplementary figure 5.**

**Bacterial burden 7 days post infection at low infectious doses.**

Bacterial burden (IFU) were determined 7 days post infection in uGT from groups of female B6C3F1 mice (n=8) who received a TC infection with 10<sup>3</sup>, 10<sup>2</sup> or 10<sup>1</sup> IFU of *C.t.* SvD. Bars indicate medians with IQR.



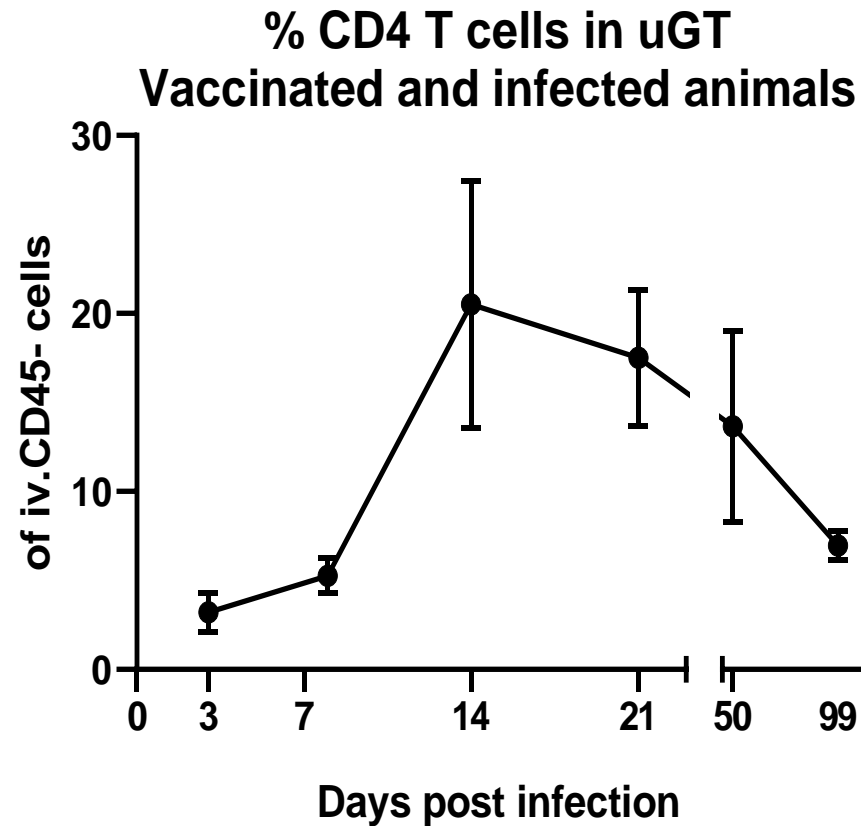

**Supplementary figure 7.**

**Percentage of CD4+ T cells in upper genital tract and their cytokine expression.**

Groups of female B6C3F1 mice (n=8) were vaccinated three times s.c. with CTH522 antigen and CAF01 adjuvant with two week intervals. Three weeks after the last immunization, the mice received a TC infection with  $10^3$  IFUs of *C.t.* SvD. Cells from uGT were surface stained for CD4 and analyzed by flow cytometry to examine the percentage of CD4+ cells in uGT at the indicated days post infection. Graph shows the means  $\pm$ SD.



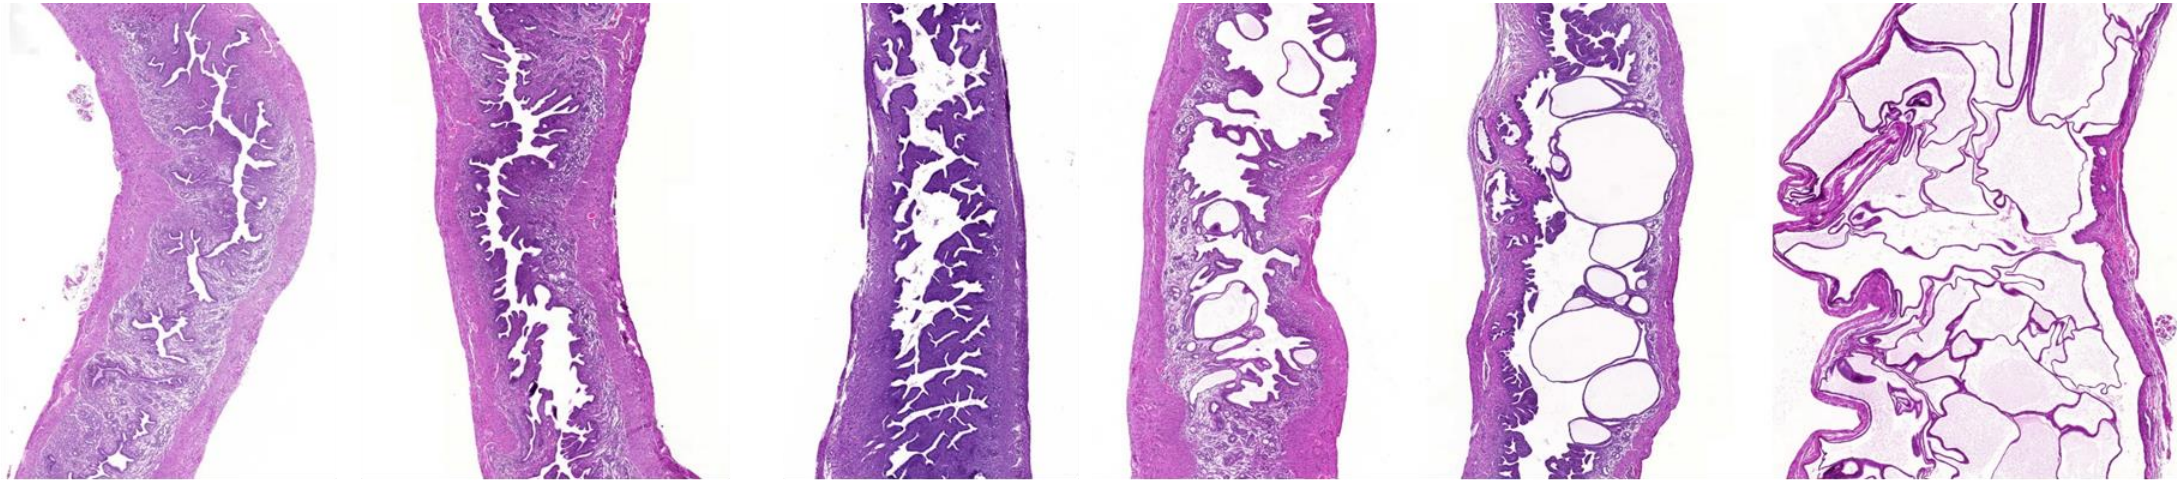

**Score 0**  
No dilation

**Score 1**  
Very mild dilation

**Score 2**  
Mild dilation

**Score 3**  
Moderate dilation

**Score 4**  
Moderately severe dilation

**Score 5**  
Severe dilation

### **Supplementary fig. 8**

#### **Pathology score.**

Examples of the histopathological scoring based on the degree of uterine horn hydrometra after an infection with  $10^3$  *C.t.* SvD. H&E stained tissue sections were assigned an inflammatory score according to the degree of hydrometra/uterine lumen dilation and glandular duct dilation. The following scores were used: 0; no dilation, 1; very mild dilation, 2; mild dilation, 3; moderate dilation with glandular duct dilation, 4; moderately severe dilation and moderate glandular duct dilation, 5; severe dilation and severe glandular duct dilation.

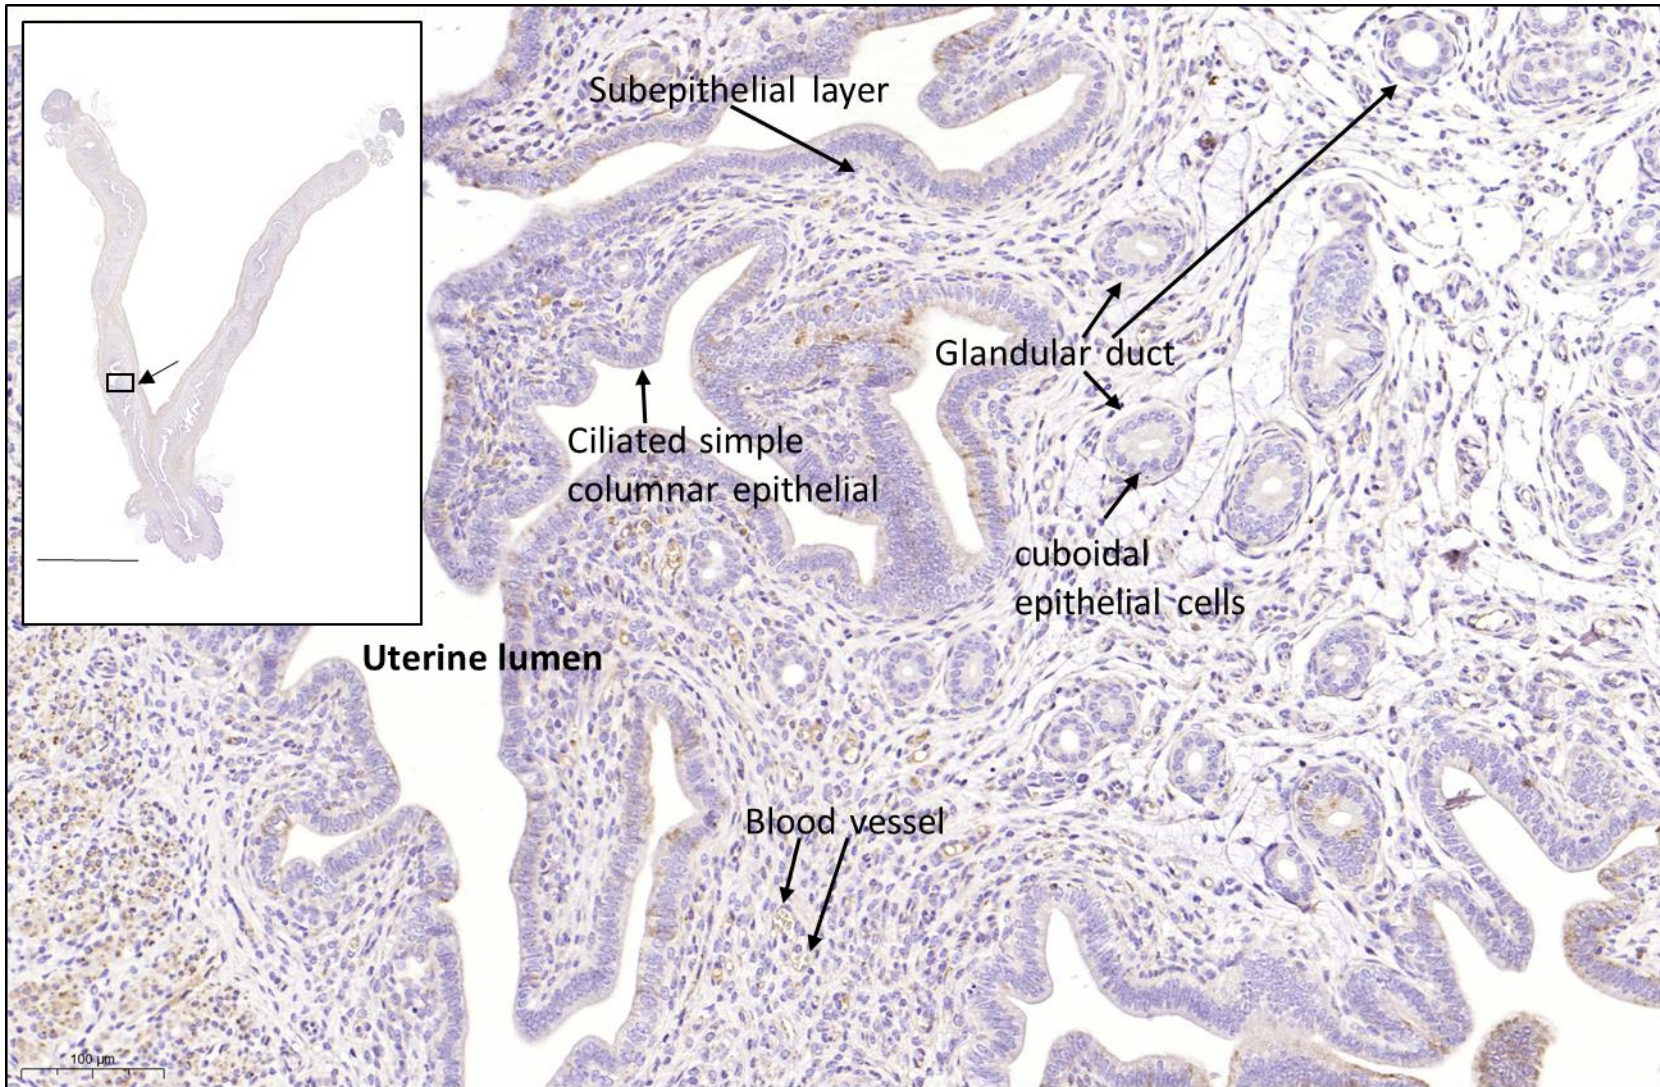

**Naive mouse**

**Supplementary fig. 9**  
**Immunohistochemical**  
**staining of CD4 and CD8 cells**  
**in the GT of naïve mice.**

GTs from naïve female B6C3F1 mice (n=3) were fixed in 4 % formaldehyde and afterwards embedded in paraffin, sectioned and stained to detect CD8 (DAB chromogen - brown) and CD4 (Permanent red chromogen) epitopes. The sections were counterstained with Mayer Hematoxylin.

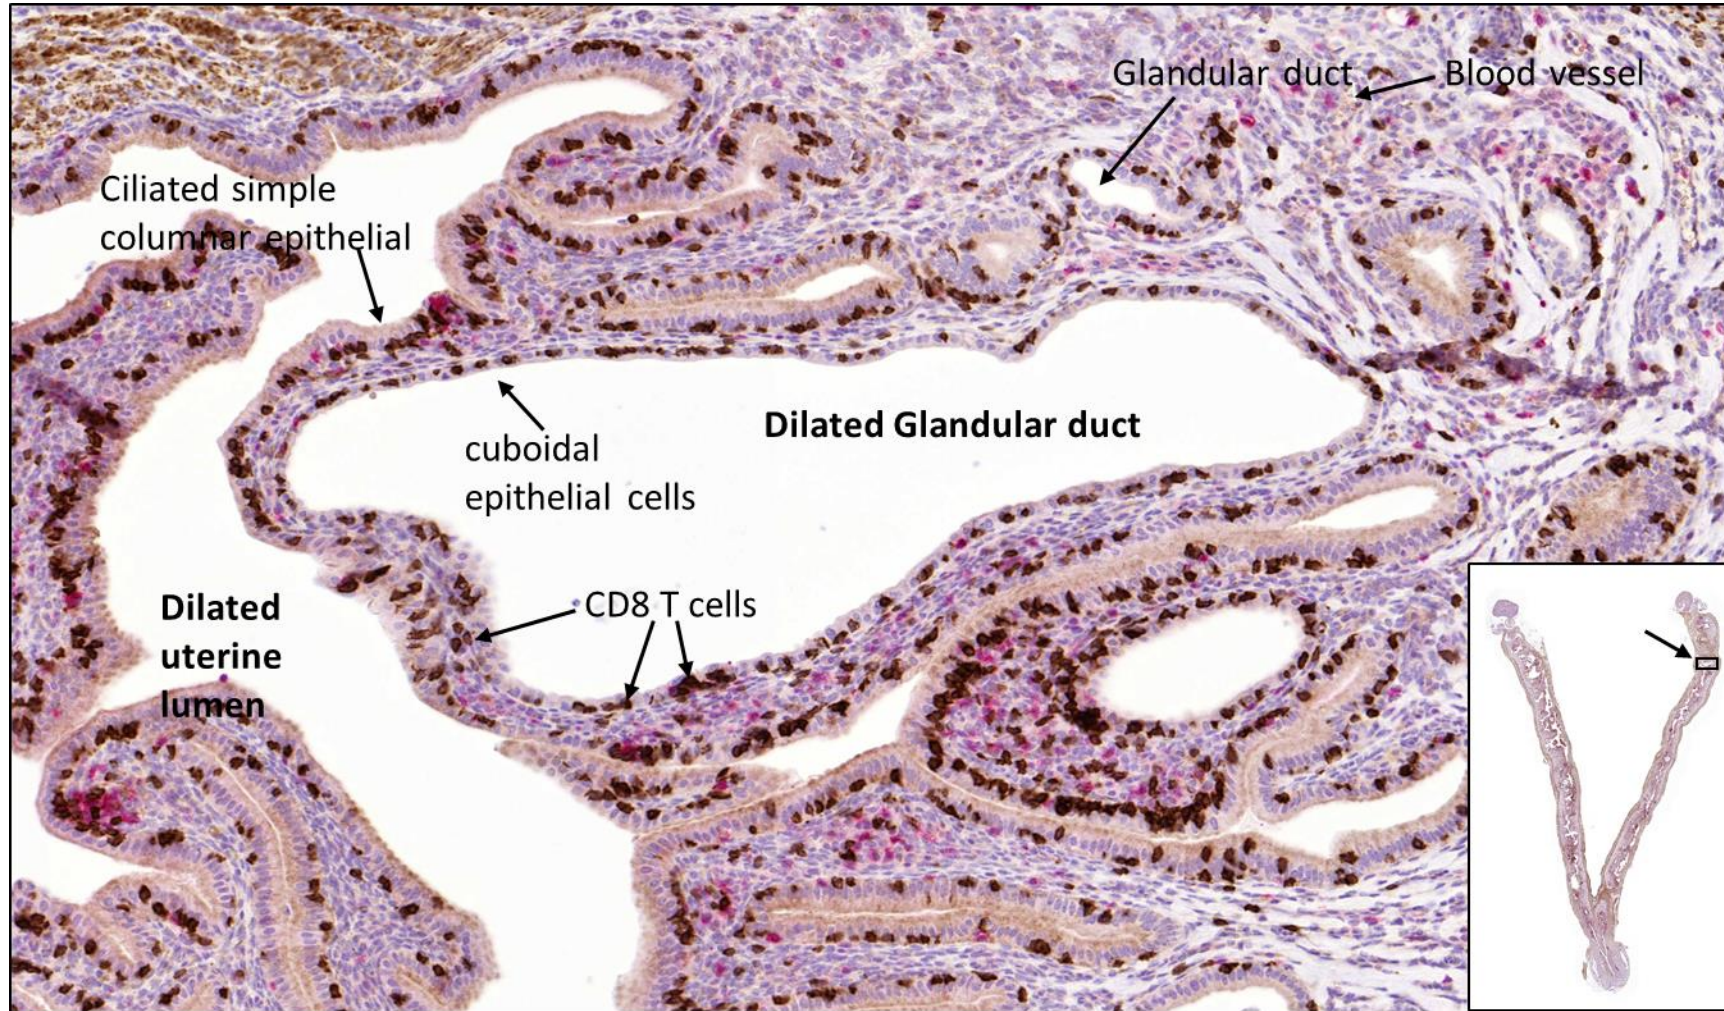

**Non-vaccinated and infected mouse**

**Supplementary fig. 10**  
**Immunohistochemical staining of CD4 and CD8 cells in the GT of non-vaccinated and infected mice.**

GTs from non-vaccinated and  $10^3$  *C.t. SvD* infected female B6C3F1 mice (n=12) were fixed in 4 % formaldehyde and afterwards embedded in paraffin, sectioned and stained to detect CD8 (DAB chromogen - brown) and CD4 (Permanent red chromogen) epitopes. The sections were counterstained with Mayer Hematoxylin.

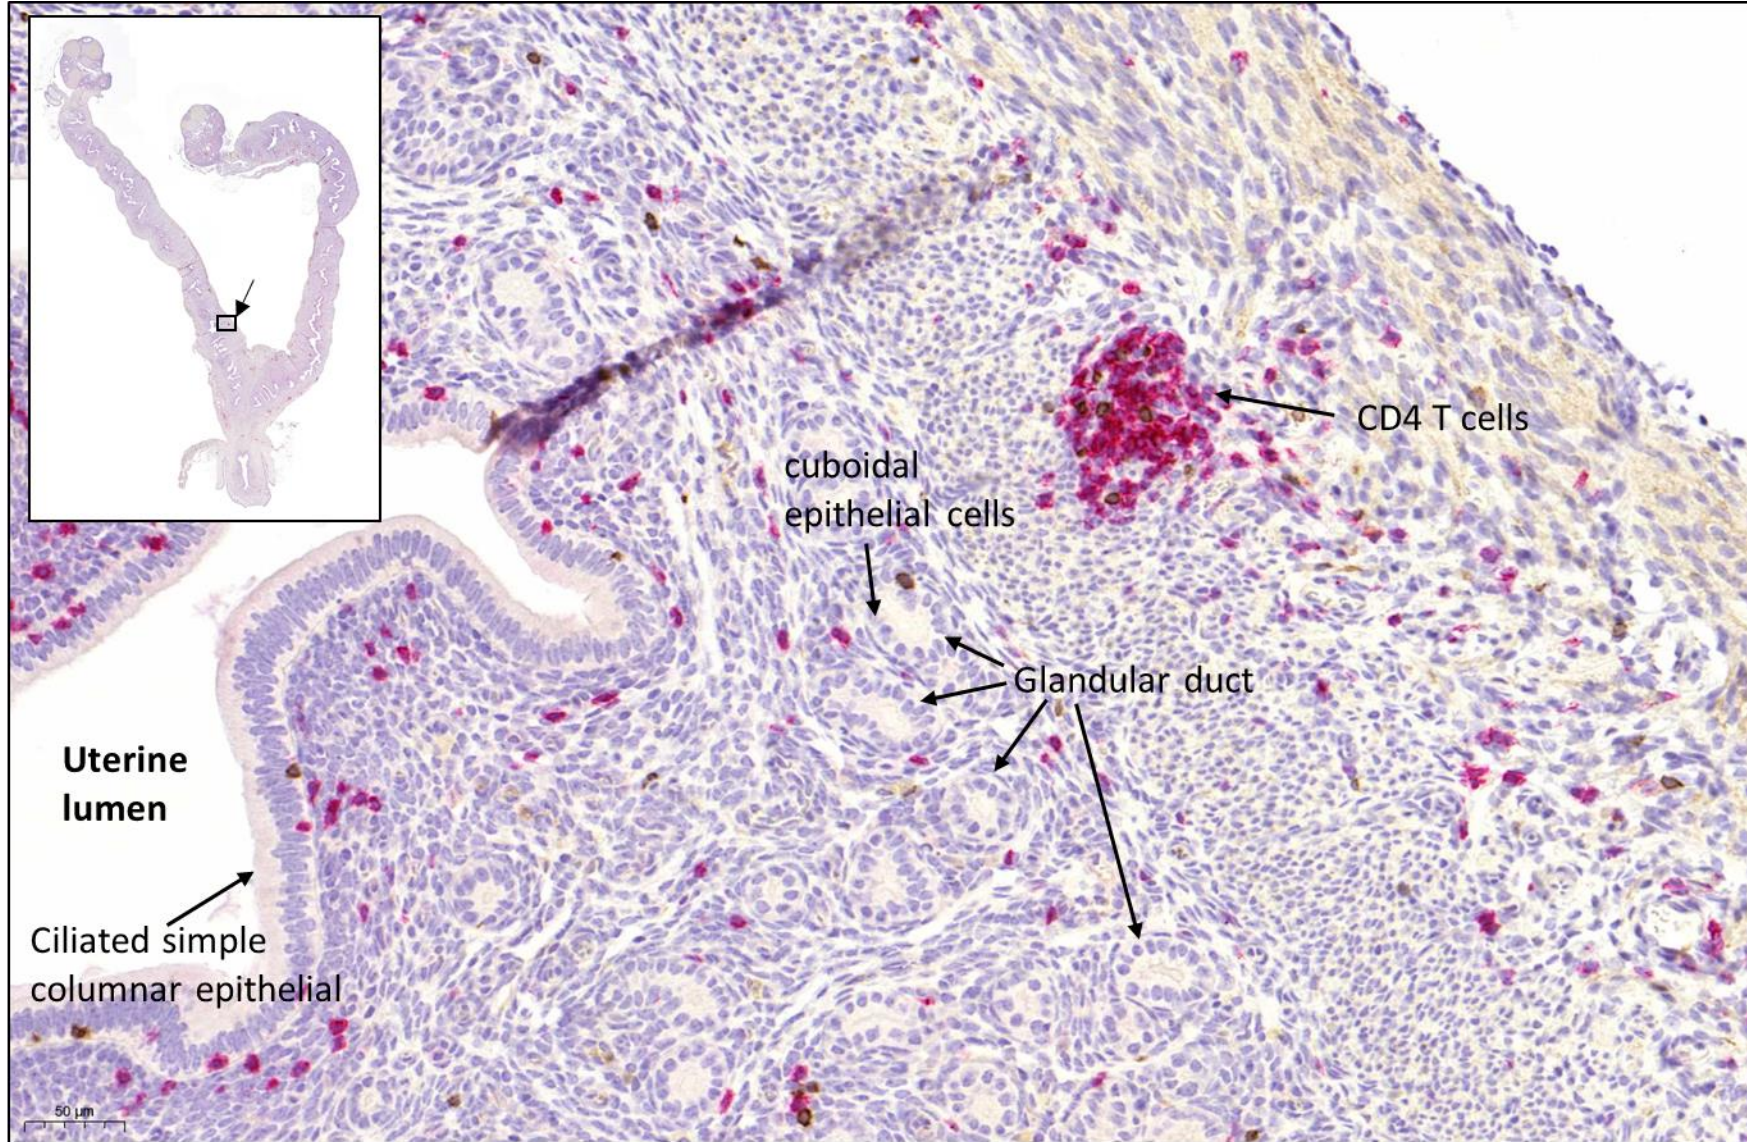

**Vaccinated and infected mice**

**Supplementary fig. 11**  
**Immunohistochemical staining of CD4 and CD8 cells in the GT of vaccinated and infected mice.** Female B6C3F1 mice (n=8) were vaccinated three times s.c. with CTH522 antigen and CAF01 adjuvant with two-week intervals. Three weeks after the last immunization, the mice received a TC infection with  $10^3$  *C.t. SvD*. GTs were harvested, fixed in 4% formaldehyde and afterwards embedded in paraffin, sectioned and stained to detect CD8 (DAB chromogen - brown) and CD4 (Permanent red chromogen) epitopes. The sections were counterstained with Mayer Hematoxylin.
